# Supplementary material
Source: PubMed Central journal article supplement (PMC6178085)
Supplement: 12250_2018_11_MOESM1_ESM.pdf [file 12250_2018_11_MOESM1_ESM.pdf]

VIROLOGICA SINICA

## Electronic Supplementary Material

### Chevrier's Field Mouse (*Apodemus chevrieri*) and Père David's Vole (*Eothenomys melanogaster*) in China Carry Orthohepeviruses that form Two Putative Novel Genotypes Within the Species *Orthohepevirus C*

Bo Wang<sup>1,4#</sup>, Wen Li<sup>1#</sup>, Ji-Hua Zhou<sup>2</sup>, Bei Li<sup>1</sup>, Wei Zhang<sup>1</sup>, Wei-Hong Yang<sup>2</sup>, Hong Pan<sup>2</sup>, Li-Xia Wang<sup>3</sup>, C. Thomas Bock<sup>4,5</sup>, Zheng-Li Shi<sup>1</sup>, Yun-Zhi Zhang<sup>2,3✉</sup>, Xing-Lou Yang<sup>1✉</sup>

1. Key Laboratory of Special Pathogens and Biosafety, Wuhan Institute of Virology, Chinese Academy of Sciences, Wuhan 430070, China
2. Yunnan Provincial Key Laboratory for Zoonosis Control and Prevention, Yunnan Institute of Endemic Diseases Control and Prevention, Dali 671000, China
3. School of Public Health, Dali University, Dali 671000, China
4. Department of Infectious Diseases, Robert Koch Institute, Berlin 13353, Germany
5. Institute of Tropical Medicine, University of Tübingen, Tübingen 72076, Germany

Supporting information to DOI: 10.1007/s12250-018-0011-8

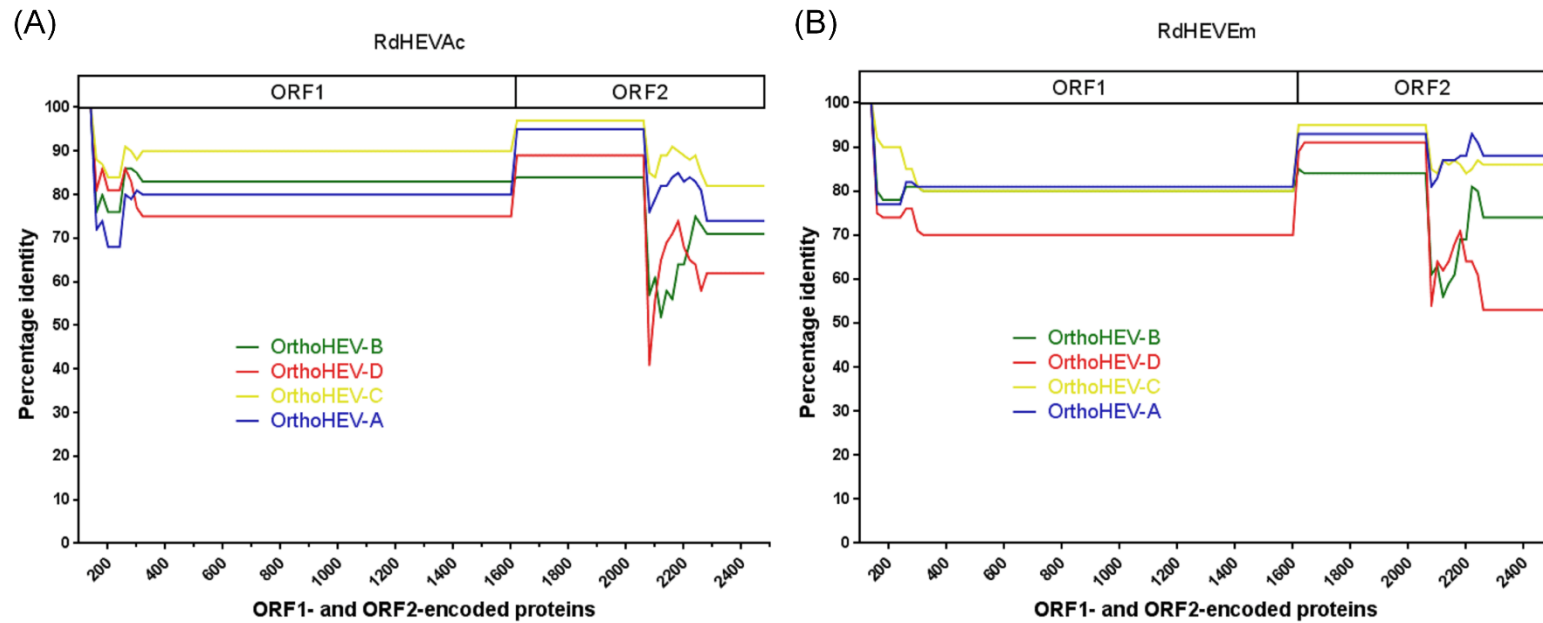

**Figure S1.** Amino acid identity plot. The complete ORF1 and ORF2 were translated, concatenated, and compared to reference strain of *Orthohepevirus A* to *D*. The GenBank accession numbers are as follows: M73218, M74506, AF082843, AJ272108, AB573435, AB602441, and KJ496143 for *Orthohepevirus A*; AY535004 for *Orthohepevirus B*; GU345042 and JN998606 for *Orthohepevirus C*; and JQ001749 for *Orthohepevirus D*. The uncorrected amino acid identity was plotted with a sliding window size of 200 and a step size of 20 amino acids. A schematic representation of concatenated ORF1 and ORF2 is shown at the top. (A) RdHEVAc. (B) RdHEVEm.

Table S1. Oligonucleotides used for orthohepevirus detection, complete genome sequencing, and viral quantification

| <sup>a</sup> Oligonucleotide | <sup>b</sup> Sequence (5' -3')      | Polarity | Use                                                      | Reference              |
|------------------------------|-------------------------------------|----------|----------------------------------------------------------|------------------------|
| HEV-F4228                    | ACYTTYTGTCYTYTITTTGGTCCITGGTT       | +        | Orthohepevirus detection                                 | (Drexler et al., 2012) |
| HEV-R4598                    | GCCATGTTCCAGAYGGTGTTC               | -        |                                                          |                        |
| HEV-R4565                    | CCGGGTTCCRCIGAGTGTTCCTTCCA          | -        |                                                          |                        |
| HEV-F400                     | GGIMGIGAYGTICAGCGITGG               | +        | Rodent orthohepeviruses full-length genome amplification | (Drexler et al., 2012) |
| HEV-F795                     | GGCIRTIGGITGYCAYTTYGT               | +        |                                                          |                        |
| HEV-F848                     | CCIATGCCITAYGTICCATCC               | +        |                                                          |                        |
| HEV-R1045                    | GTCAKIAGICKIGARCARARIGC             | -        |                                                          |                        |
| HEV-R1065                    | ATVCCICGIAGRATAIGTCATDAG            | -        |                                                          |                        |
| HEV-R1075                    | GTIACYTTGTAYSWRATICCICGIAGRATAIGTCA | -        |                                                          |                        |
| HEV-F5760                    | CTGACGTTTTTCGACCTGTTCGT             | +        |                                                          |                        |
| HEV-F5770                    | GCGTCTGTCCGGTGGGTTTTTC              | +        |                                                          |                        |
| HEV-F5790                    | GGCCACAGTCCAACAATGTTC               | +        |                                                          |                        |
| HEV-R5780                    | CTTATAGAAAACCCACCGACAGAC            | -        |                                                          |                        |
| HEV-R5810                    | ATGTTGGAACATTGTTGGACTGTG            | -        |                                                          |                        |
| HEV-R5960                    | GTYTCGACAGAGCGCCAICC                | -        |                                                          |                        |
| HEV-R6473                    | CCIAGGTCTATRTCCTGTGIGG              | -        |                                                          |                        |
| HEV-R6493a                   | TCCTGCTCRTGCTGRTTATCATARTCCTG       | -        |                                                          |                        |
| HEV-R6493b                   | TCCTGGAGRTGCTGRTTATCAAARTCCTG       | -        |                                                          |                        |
| HEV-F6376a                   | GTCTCGGCAATGGCGAGCC                 | +        |                                                          |                        |
| HEV-F6376b                   | GTGTCTGAGAACGGTGAGCC                | +        |                                                          |                        |
| HEV-F6493a                   | CAGGAYTATGATAAYCAGCAYGAGCAGGA       | +        |                                                          |                        |
| HEV-F6493b                   | CAGGAYTTTGATAAYCAGCAYCTCCAGGA       | +        |                                                          |                        |
| HEV-R6865                    | CRGTRGTRTRTAATTRTARGGRTARCCRG       | -        |                                                          |                        |
| RdHEVAc-F860                 | AAGTCTCAGGTAGTGTACGTC               | +        | Rodent orthohepeviruses full-length genome amplification | This study             |
| RdHEVAc-HEV-F1030            | GCTGCTCTAGGCTCATGACC                | +        |                                                          |                        |
| RdHEVAc-HEV-F1517            | GTGAGGACCTGAGTGATGAG                | +        |                                                          |                        |
| RdHEVAc-HEV-R4115            | AGGCAATCTGTCCACAATAGC               | -        |                                                          |                        |
| RdHEVAc-HEV-R4265            | CATCAACACACACTCCAATC                | -        |                                                          |                        |
| RdHEVAc-HEV-R4780            | CTGTAATACCTTGTAGCAAGT               | -        |                                                          |                        |
| RdHEVAc-HEV-R5599            | GACATCGGTGGACATTATAG                | -        |                                                          |                        |

|                                |                            |   |                                               |            |
|--------------------------------|----------------------------|---|-----------------------------------------------|------------|
| RdHEVE <sub>m</sub> -HEV-F947  | TGCACGRTCCACYTTCCATG       | + |                                               |            |
| RdHEVE <sub>m</sub> -HEV-F1004 | GGTGTACAYTAGATGAYGAT       | + |                                               |            |
| RdHEVE <sub>m</sub> -HEV-R3250 | CTCGTGCACAGTTATAGCAG       | - |                                               |            |
| RdHEVE <sub>m</sub> -HEV-R4322 | AGCGGACCTTATYARATGGTAT     | - |                                               |            |
| RdHEVE <sub>m</sub> -HEV-R4263 | TTCAGCCATTATCTCACAYTC      | - |                                               |            |
| RdHEVE <sub>m</sub> -HEV-R4290 | CATARAGGCATRCCAACCTC       | - |                                               |            |
| 5' RACE-HEV-R470               | CCTGCAATTCTCAAATCCTCGGACAC | - |                                               |            |
| 5' RACE-HEV-R490               | GGTGCAGCTCATGAAGCGAGTAGAG  | - |                                               |            |
| 3' RACE-HEV-F6339              | GGAGCTGARTATAAGCAGTCT      | + |                                               |            |
| 3' RACE-HEV-F6457              | GGACGAAGTGACTATTAAYGG      | + |                                               |            |
| HEV-qPCR-F                     | GTTGATGGCTGAAGCAGGTATG     | + | Specific rodent orthohepevirus quantification | This study |
| HEV-qPCR-probe                 | FAM-ATGGATGTGGAAGTTGT-BHQ1 | + |                                               |            |
| HEV-qPCR-F                     | CCATGCCGACCTCAMYARATG      | - |                                               |            |

<sup>a</sup>Named after the position in the reference sequence under GenBank accession number NC\_001434.

<sup>b</sup>R is G/A, Y is C/T, S is G/C, W is A/T, M is A/C, K is G/T, H is A/C/T, N is A/T/C/G, and I is inosine.
